# Supplementary material
Source: publisher site journal article supplement (https://www.spandidos-publications.com/2926/downloadSupplementary)

Figure S1. Changes in serum (A) TGF- $\beta$ 1 and (B) PINP levels in two patients with airway stenosis prior to each bronchoscopy. The time interval between the bronchoscopies was 1 month. TGF- $\beta$ 1, transforming growth factor  $\beta$ 1; PINP, procollagen type I N-propeptide.

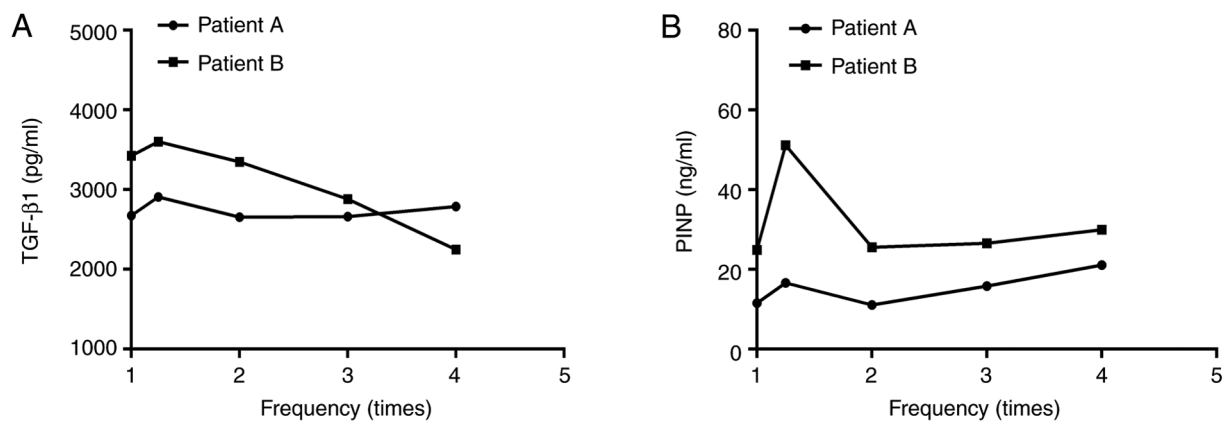

Supplement: Supplementary file 1 [file downloadSupplementary]
